# Supplementary material for: We’re building it up to burn it down: fire occurrence and fire-related climatic patterns in Brazilian biomes
Source: PeerJ. 2022 Oct 25;10:e14276. doi: 10.7717/peerj.14276 (PMC9615963; doi:10.7717/peerj.14276)
Supplement: Table S1 [file peerj-10-14276-s001.xlsx]

## Sheet: Table S1
Table S1. Synthesis of the modelling steps used to access the relationship between climate and fire occurrence following the ODMAP protocol described by Zurell et al. 2020.
ODMAP protocol								Obligatory
								Objective: Explanation/Inference
								Objective: Transfer/Forecast
								Optional
ODMAP section			ODMAP subsection			ODMAP elements
		Overview			Authorship			· Authors: Luisa Maria Diele-Viegas, Lilian P. Sales, Juliana Hipólito, Claudjane Amorim, Eder J. A. L. Pereira, Paulo Ferreira, Cody Folta, Lucas Ferrante, Philip M. Fearnside, Ana Claudia Malhado, Carlos Frederico Duarte Rocha, Mariana M. Vale
								· Contact email: luisa.mviegas@gmail.com
								· Title: We're building it up to burn it down: Fire occurrence and fire-related climatic patterns in Brazilian biomes
								· DOI
					Model objective			· SDM objective/purposes: Ecological Inference < Forecast
								· Main target output: suitable vs unsuitable area in the present and the future.
					Taxon			· Focal taxon: Fire occurrence
					Location			· Location of study area: Brazilian Biomes
					Scale of analysis			· Spatial Extent (Lon / Lat): Brazilian territory ( -14° 14' 24.26" S, -53° 10' 49.81" W)
								· Spatial resolution: 0.5° / 60 km²
								· Temporal extent/time period: present (1970-2000) and future (2041-2060, named 2050; and 2081-2100, named 2090)
								· Type of extent boundary: political (Brazil), natural (Biomes)
					Biodiversity data overview			· Observation type: standardised monitoring data
								· Response/data type: presence-only
					Type of predictors			· Bioclimatic
					Conceptual model			· Hypotheses: Climate change has a major role in fire occurrence of fire-dependent biomes, potentially increasing it over time. In fire-independent and fire-sensitive biomes, climate change has a minor role in fire occurrence. In the future, fire occurrence is not likely to be impacted by climate change in fire-independent biomes, but can be indirectly affected in fire-sensitive biomes.
					Assumptions			· Critical model assumptions: Climatic conditions are at least partially responsible for fire occurrence
					SDM algorithms			· Model algorithms: Bioclim, GLM, SVM
								· Justification of model complexity: the model settings were chosen to yield simple, smooth response surfaces because we attempt to highlight climatically similar regions and relate them to the recorded fires in Brazil. By assessing the environmental conditions associated with fire events, it was possible to predict the probability of fire occurrence through time and over geographic space.
								· Is model averaging/ensemble modelling used? Yes
					Model workflow			· Conceptual description of modelling steps: We confronted data of climatic predictors with fire occurrence to understand the particularities of this relationship in different Brazilian biomes and their consequences under different climate-change scenarios. By assuming that climatic conditions are at least partially responsible for fire occurrence, we modelled fire occurrence by highlighting clim…
					Software, codes and data			· Modelling platform: R v. 3.5.1.; key packages: biomod2, dismo, raster, and rgdal
								· Availability of data: fire occurrence: https://queimadas.dgi.inpe.br/queimadas/portal ; bioclimatic variables: https://www.worldclim.org/; Biomes' geographic boundaries: http://ibge.gov.br/).
		Data			Focal group data			· Focal group: Fire occurrence
								· Sampling design: Monitoring data from the AQUA_M-T satellite
								· Number of observations: 4,546,557
								· Country/region masl: Brazil
								· Details on data cleaning/filtering steps: Duplicates, equal coordinates, zeros, and fire occurrences outside the area of interest (i.e., the Brazilian territory). After filtering, we randomly subsampled 1% of the filtered occurrence points (N = 4463) to proceed with the analysis.
								· Details on absence data collection: we randomly sampled 10,000 pseudoabsences for the BIOCLIM and GLM algorithms while maintaining occurrence prevalence for SVM
					Data partitioning			· Selection of training data (for model fitting): 30% of fire-occurrence records measured the performance of models fitted to the remaining 70% of the records.
								· Selection of validation data: We used the cross-validation method and ran ten replicates for each algorithm (in a total of 30 models) to increase the robustness of the results.
					Predictor variables			· Predictor variables used: two annual variables (annual mean temperature; BIO1, and annual precipitation; BIO12) and two variables related to the dry (or fire-prone) season (mean temperature of the driest quarter; BIO9, and precipitation of the driest quarter; BIO17)
								· Details on data sources: WorldClim version 2.1 (Fick & Hijmans, 2017; https://www.worldclim.org/)
								· Spatial resolution and spatial extent of raw data: 2.5 arc-min / 5km²
								· Map projection (coordinate reference system): latitude/longitude
								· Temporal resolution and temporal extent: historical (1970-2000) and future (2041-2060 and 2081-2100).
								· Details on data processing and on spatial, temporal and thematic scaling: data downscaled to 60km²
					Transfer data for projection			· Details on data sources: WorldClim version 2.1 (Fick & Hijmans, 2017; https://www.worldclim.org/)
								· Spatial extent raw: 5km²
								· Final spatial resolution: ( -14° 14' 24.26" S, -53° 10' 49.81" W)
								· temporal extent/time period: 2050 (2041-2060), 2090 (2081-2100)
								· temporal resolution: 20 years
								· Models and scenarios used: two shared socioeconomic pathways (SSP) (Riahi et al., 2017), SSP2 45 and SSP5 85 (IPCC, 2021), and three general circulation models (GCMs) of the Coupled Model Intercomparison Project Phase Six (CMIP6) (Eyring et al., 2016) with particularly good performance in South America (Cannon, 2020): 1) Beijing Climate Center model (BCC-CSM2-MR); 2) Institute Pierre Simon Lapl…
								· Details on data processing and scaling: data downscaled to 60km²
								· Quantification of novel environmental conditions and novel environmental combinations: distance to training data
					Multicollinearity			· Justification if multicollinearity is not explicitly dealt with: To assess the relationship between climate and fire occurrence, we considered four bioclimatic variables whose links to fire frequency and intensity are well established (Oliveira-Júnior et al., 2020).
					Model settings			· Models settings for all selected algorithms: GLM: family binominal, link logit; SVM: type C-svc (classification), with the ‘C’-constant of the regularization term in the Lagrange formulation (cost of constraints violation) setted to 1 and data scaled internally to zero mean and unit variance.
					Model estimates			· Assessment of model coefficients: The best models were selected based on an Area Under the Curve (AUC) over 0.7 (Hanley & McNeil, 1982), True Skill Statistic (TSS) over 0.3, and Threshold over 0.8. The threshold was calculated as the point at which the sum of the sensitivity (true positive rate) and specificity (true negative rate) was highest (Hijmans et al., 2017; Shabani, Kumar & Ahmadi, 201…
					Model selection / Model averaging / Ensembles			· Ensemble method: A final consensus map was obtained by weighting the cell-based prediction of fire probability by the accuracy of the parent model.
								· Performance statistics estimated on validation data: The best models were selected based on an Area Under the Curve (AUC) over 0.7 (Hanley & McNeil, 1982), True Skill Statistic (TSS) over 0.3, and Threshold over 0.8. The threshold was calculated as the point at which the sum of the sensitivity (true positive rate) and specificity (true negative rate) was highest (Hijmans et al., 2017; Shabani, …
								· Expert judgement: inspection of the spatial predictions
		Prediction			Prediction output			· Prediction unit: continuous thermal adequability for fire occurrence
