# Supplementary material for: We’re building it up to burn it down: fire occurrence and fire-related climatic patterns in Brazilian biomes
Source: PeerJ. 2022 Oct 25;10:e14276. doi: 10.7717/peerj.14276 (PMC9615963; doi:10.7717/peerj.14276)
Supplement: Table S2 — We considered only those with AUC > 0.7, TSS > 0.3 and Threshold > 0.8 to be included in the ensemble. [file peerj-10-14276-s002.xlsx]

## Sheet: Table S2
Table S2. Area Under the Curve (AUC), True Skill Statistic (TSS), and Threshold of all evaluated algorithms. We considered only those with AUC > 0.7, TSS > 0.3 and Threshold > 0.8 to be included in the ensemble.
Replica	Algorithm	AUC	TSS	Threshold
1	bioclim	0.622789	0.188519	0.246334
1	domain	0.654011	0.266134	0.76841
1	glm	0.648222	0.246761	0.458566
1	svm	0.704363	0.332935	0.885374
2	bioclim	0.634036	0.196835	0.203805
2	domain	0.661415	0.268706	0.748019
2	glm	0.665404	0.262834	0.506849
2	svm	0.705129	0.339478	0.926215
3	bioclim	0.627289	0.200328	0.109562
3	domain	0.660554	0.264097	0.753316
3	glm	0.664042	0.269863	0.468403
3	svm	0.702136	0.324457	0.715665
4	bioclim	0.633814	0.191225	0.277109
4	domain	0.663791	0.254212	0.77375
4	glm	0.66377	0.277586	0.355866
4	svm	0.69543	0.338986	0.866361
5	bioclim	0.642312	0.204381	0.226533
5	domain	0.678858	0.290494	0.752462
5	glm	0.66372	0.238804	0.465832
5	svm	0.708862	0.33376	0.911626
6	bioclim	0.63663	0.197817	0.269913
6	domain	0.665988	0.26389	0.750109
6	glm	0.664295	0.260387	0.49357
6	svm	0.697452	0.329536	0.881052
7	bioclim	0.615065	0.162303	0.261104
7	domain	0.651108	0.244703	0.749771
7	glm	0.645481	0.264223	0.469387
7	svm	0.685475	0.304062	0.771451
8	bioclim	0.614744	0.162219	0.168488
8	domain	0.660518	0.262268	0.752323
8	glm	0.660778	0.279186	0.478838
8	svm	0.691303	0.33986	0.826169
9	bioclim	0.641997	0.214082	0.131782
9	domain	0.668162	0.272028	0.754092
9	glm	0.658213	0.248718	0.426212
9	svm	0.688794	0.310812	0.879601
10	bioclim	0.644743	0.213567	0.131462
10	domain	0.6771	0.286758	0.741494
10	glm	0.678912	0.291858	0.511914
10	svm	0.716518	0.360311	0.906994
