# Supplementary material for: We’re building it up to burn it down: fire occurrence and fire-related climatic patterns in Brazilian biomes
Source: PeerJ. 2022 Oct 25;10:e14276. doi: 10.7717/peerj.14276 (PMC9615963; doi:10.7717/peerj.14276)
Supplement: Table S3 — NFDC = Natural-Fire Dependence Classification. [file peerj-10-14276-s003.xlsx]

## Sheet: Table S3
Table S3. Changes in annual mean temperature, mean temperature of driest quarter, annual precipitation and precipitation of driest quarter (%). NFDC = Natural-Fire Dependence Classification.
Annual mean temperature (%)
NFDC	Biome	2050 SSP2 45	2090 SSP2 45	2050 SSP5 85	2090 SSP5 85
Fire-Dependent	Cerrado	8.07	12.2	10.54	22.67
	Pampa	7.59	10.91	9.43	19.85
	Pantanal	7.66	11.7	9.98	21.55
Fire-Independent	Caatinga	6.86	10.22	8.79	18.83
Fire-Sensitive	Amazon	7.51	11.21	9.69	21.21
	Atlantic Forest	7.24	10.98	9.415	20.04
	Atlantic Forest NE	6.05	9.19	7.86	16.8
	Atlantic Forest SE	8.43	12.77	10.97	23.28
Mean Temperature of Driest Quarter (%)
NFDC	Biome	2050 SSP2 45	2090 SSP2 45	2050 SSP5 85	2090 SSP5 85
Fire-Dependent	Cerrado	8.59	13.11	11.15	24.47
	Pampa	-4.82	0.06	1.27	6.05
	Pantanal	8.43	12.93	11.14	26.17
Fire-Independent	Caatinga	6.98	10.4	8.88	18.91
Fire-Sensitive	Amazon	8.2	12.37	10.82	23.62
	Atlantic Forest	7.34	12.01	10.3	22.685
	Atlantic Forest NE	6.37	9.82	8.63	17.91
	Atlantic Forest SE	8.31	14.2	11.97	27.46
Annual Precipitation (%)
NFDC	Biome	2050 SSP2 45	2090 SSP2 45	2050 SSP5 85	2090 SSP5 85
Fire-Dependent	Cerrado	0.32	-1.11	-0.44	-1.96
	Pampa	2.84	6.22	5.07	14.1
	Pantanal	1.58	-2.65	0.55	1.3
Fire-Independent	Caatinga	-1.93	-4.42	-4.58	-9.55
Fire-Sensitive	Amazon	-3.43	-4.45	-4.46	-9.37
	Atlantic Forest	-3.075	-5.81	-5.57	-8.045
	Atlantic Forest NE	-7.42	-12.97	-12.59	-20.81
	Atlantic Forest SE	1.27	1.35	1.45	4.72
Precipitation of Driest Quarter (%)
NFDC	Biome	2050 SSP2 45	2090 SSP2 45	2050 SSP5 85	2090 SSP5 85
Fire-Dependent	Cerrado	-5.07	-6.01	-5.07	-7.47
	Pampa	-2.77	0.38	-2	5.87
	Pantanal	-6.11	-7.12	-3.09	-6.26
Fire-Independent	Caatinga	-9.98	-14.3	-13.69	-19.71
Fire-Sensitive	Amazon	-4.36	-9.15	-8.24	-18.05
	Atlantic Forest	-10.555	-11.695	-11.765	-15.245
	Atlantic Forest NE	-14.3	-18.94	-19.56	-28.23
	Atlantic Forest SE	-6.81	-4.45	-3.97	-2.26
