# Supplementary material for: We’re building it up to burn it down: fire occurrence and fire-related climatic patterns in Brazilian biomes
Source: PeerJ. 2022 Oct 25;10:e14276. doi: 10.7717/peerj.14276 (PMC9615963; doi:10.7717/peerj.14276)
Supplement: Table S4 — ΔP is the percentage of change in BIO12 (annual precipitation) recovered for each biome; ΔσP is the interannual variability of precipitation; ΔσT is the interannual variability of temperature; and RWAF is the Regional warming Amplification Factor, i.e., the difference between the change in BIO1 (annual mean temperature) recovered for each biome and the mean global temperature change (2 °C and 2.7 °C in SSP2 45 and 2.4 °C and 4.4 °C in SSP5 85, considering 2050 and 2090, respectively (IPCC, 2021)). n ΔP, n ΔσP, n ΔσT, and nRWAF are the empirical factors that depend on the magnitude of the involved change (see Table 1). NFDC = Natural-Fire Dependence Classification. [file peerj-10-14276-s004.xlsx]

## Sheet: Table S4
Table S4. Factors used for calculating the Regional Climate Change Index (RCCI) considered a proxy for Climate Hazard. ∆P is the percentage of change in BIO12 (annual precipitation) recovered for each biome; ΔσP is the interannual variability of precipitation; ΔσT is the interannual variability of temperature; and RWAF is the Regional warming Amplification Factor, i.e., the difference between the…
SSP2 45
		2050									2090
NFDC	Biome	Δp	RWAF	ΔσT	ΔσP	nΔp	nRWAF	nΔσT	nΔσP	RCCI	Δp	RWAF	ΔσT	ΔσP	nΔp	RWAF	nΔσT	nΔσP	RCCI
Fire-Dependent	Cerrado	0.32	0.501661	8.59	5.07	0	0	1	1	13.66	1.11	0.196244	13.11	6.01	0	0	2	1	32.23
	Pampa	2.84	-0.198461	4.82	2.77	0	0	0	0	0	6.22	-0.617085	0.06	0.38	1	0	0	0	6.22
	Pantanal	1.58	0.547693	8.43	6.11	0	0	1	1	14.54	2.65	0.286089	12.93	7.12	0	0	2	1	32.98
Fire-Independent	Caatinga	1.93	0.157895	6.98	9.98	0	0	1	1	16.96	4.42	-0.192197	10.4	14.3	0	0	2	2	49.4
Fire-Sensitive	Amazon	3.43	0.50715	8.2	4.36	0	0	1	0	8.2	4.45	0.20174	12.37	9.15	0	0	2	1	33.89
	Atlantic Forest (Averaged)	4.345	0.00792389	7.34	10.555	0.5	0	1	1.5	28.755	7.16	-0.356766	12.01	11.695	1	0	1.5	1	51.02
	Atlantic Forest NE	7.42	-0.166803	6.37	14.3	1	0	1	2	42.39	12.97	-0.554524	9.82	18.94	2	0	1	2	73.64
	Atlantic Forest SE	1.27	0.182651	8.31	6.81	0	0	1	1	15.12	1.35	-0.159009	14.2	4.45	0	0	2	0	28.4
SSP5 85
		2050									2090
NFDC	Biome	Δp	RWAF	ΔσT	ΔσP	nΔp	RWAF	nΔσT	nΔσP	RCCI	Δp	RWAF	ΔσT	ΔσP	nΔp	RWAF	nΔσT	nΔσP	RCCI
Fire-Dependent	Cerrado	0.44	0.101661	11.15	5.07	0	0	2	1	27.37	1.96	0.979956	24.47	7.47	0	0	4	1	105.35
	Pampa	5.07	-0.598461	1.27	2	1	0	0	0	5.07	14.1	-0.609417	6.05	5.87	2	0	1	1	40.12
	Pantanal	0.55	0.147693	11.14	3.09	0	0	2	0	22.28	1.3	1.10264	26.17	6.26	0	1	4	1	112.043
Fire-Independent	Caatinga	4.58	-0.242105	8.88	13.69	0	0	1	2	36.26	9.55	0.22156	18.91	19.71	1	0	4	2	124.61
Fire-Sensitive	Amazon	4.46	0.10715	10.82	8.24	0	0	2	1	29.88	9.37	1.08946	23.62	18.05	1	0	4	2	139.95
	Atlantic Forest (Averaged)	7.02	-0.392076	10.3	11.765	1	0	1.5	1	48.435	12.765	-0.123785	22.685	15.245	2	0	4	2	188.82
	Atlantic Forest NE	12.59	-0.566803	8.63	19.56	2	0	1	2	72.93	20.81	-0.479891	17.91	28.23	4	0	4	4	267.8
	Atlantic Forest SE	1.45	-0.217349	11.97	3.97	0	0	2	0	23.94	4.72	0.232321	27.46	2.26	0	0	4	0	109.84
