# Supplementary material for: We’re building it up to burn it down: fire occurrence and fire-related climatic patterns in Brazilian biomes
Source: PeerJ. 2022 Oct 25;10:e14276. doi: 10.7717/peerj.14276 (PMC9615963; doi:10.7717/peerj.14276)
Supplement: Table S5 — NFDC = Natural-Fire Dependence Classification. [file peerj-10-14276-s005.xlsx]

## Sheet: Table S5
Table S5. Vegetation sensitivity, forest loss, non-protected areas and resilience status of Brazilian Biomes. NFDC = Natural-Fire Dependence Classification.
NFDC	Biome	Sensitivity ± SD	Vegetation Loss (%)	Non-protected area (%)
Fire-Dependent	Cerrado	19.02 ± 6.05	0.476	0.974
	Pampa	20.02 ± 3.74	0.502	0.996
	Pantanal	13.87 ± 3.33	0.369	0.971
Fire-Independent	Caatinga	19.61 ± 3.70	0.415	0.989
Fire-Sensitive	Amazon	16.53 ± 3.62	0.183	0.901
	Atlantic Forest	14.66 ± 3.09	0.865	0.981
	Atlantic Forest NE	12.32 ± 3.08	0.849	0.987
	Atlantic Forest SE	16.99 ± 3.09	0.881	0.974
