# Supplementary material for: We’re building it up to burn it down: fire occurrence and fire-related climatic patterns in Brazilian biomes
Source: PeerJ. 2022 Oct 25;10:e14276. doi: 10.7717/peerj.14276 (PMC9615963; doi:10.7717/peerj.14276)
Supplement: Table S6 — NFDC = Natural-Fire Dependence Classification. Colours represent aspects that make them more (red) or less (green) susceptible to that characteristic than the other biomes. [file peerj-10-14276-s006.xlsx]

## Sheet: Table S6
Table S6. Synthesis of the results concerning Fire Persistence over time (FPt), Fire Occurrence Suitability (FOS), Climate Hazard, Vegetation Sensitivity Index (FSI), Percentage of Vegetation Loss (VL), Percentage of Non-Protected Area (NPA), Resilience Status (R), Vulnerability Index (Vi), and Climate Risk. Hazard and Climate Risk are described per scenario (SSP2 45 and SSP5 85) and year (2050 a…
NFDC	Biome	FPt	FOS	Hazard				VSI	VL	NPA	R	Vi	Climate Risk
				SSP2 45		SSP5 85							SSP2 45		SSP5 85
				2050	2090	2050	2090						2050	2090	2050	2090
Fire-Dependent	Cerrado	0.63	0.78	13.66	32.23	27.37	105.35	19.02	47.6	97.4	72.5	11.725	160.164	377.897	320.913	1235.23
	Pampa	0.63	0.19	0	6.22	5.07	40.12	20.02	50.2	99.6	74.9	13.425	0	83.5035	68.0648	538.611
	Pantanal	0.63	0.88	14.54	32.98	22.28	112.043	13.87	36.9	97.1	67	6.4	93.056	211.072	142.592	717.073
Fire-Independent	Caatinga	0.61	0.64	16.96	49.4	36.26	124.61	19.61	41.5	98.9	70.2	10.87	184.355	536.978	394.146	1354.51
Fire-Sensitive	Amazon	0.63	0.62	8.2	33.89	29.88	139.95	16.53	18.3	90.1	54.2	1.33	10.906	45.0737	39.7404	186.134
	Atlantic Forest	0.72	0.49	28.755	51.02	48.44	188.82	14.66	86.5	98.1	92.3	19.445	559.141	992.084	941.916	3671.6
